# Supplementary material for: Comparative phylogeography reveals widespread cryptic diversity driven by ecology in Panamanian birds
Source: PubMed Central journal article supplement — bioRxiv. 2023 Mar 16:2023.03.15.530646. Preprint. [Version 1] doi: 10.1101/2023.03.15.530646 (PMC10055050; doi:10.1101/2023.03.15.530646), 2023-03-16
Supplement: media-2.pdf [file media-2.pdf]

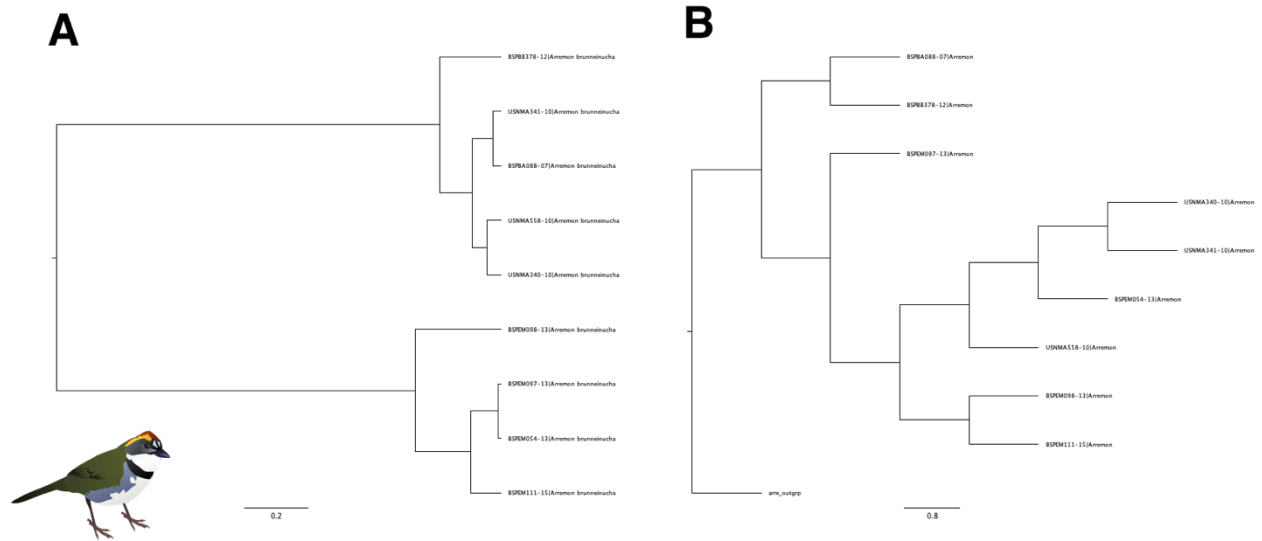

Figure S1: COI trees of *Arremon brunneinucha*, with both A) a NJ tree constructed in MEGA and B) a ML tree constructed in RaxML.

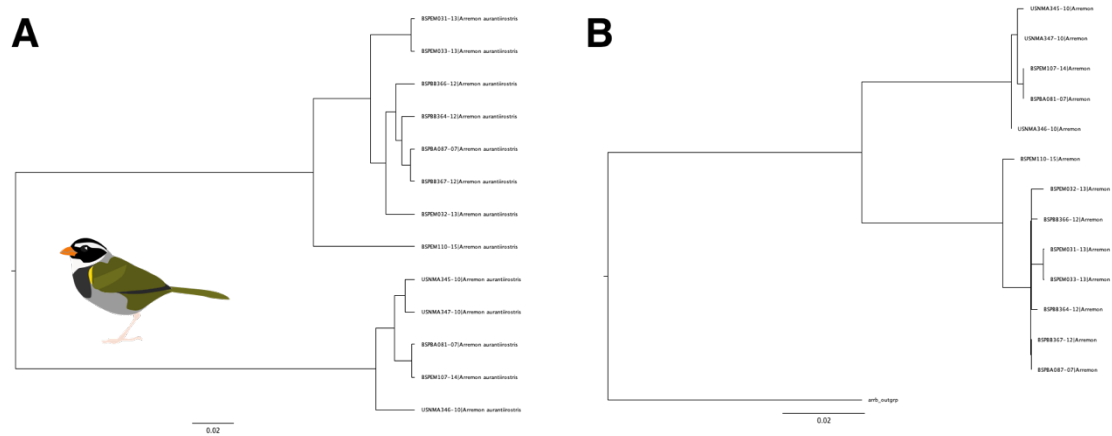

Figure S2: COI trees of *Arremon aurantiirostris* with both A) a NJ tree constructed in MEGA and B) a ML tree constructed in RaxML.

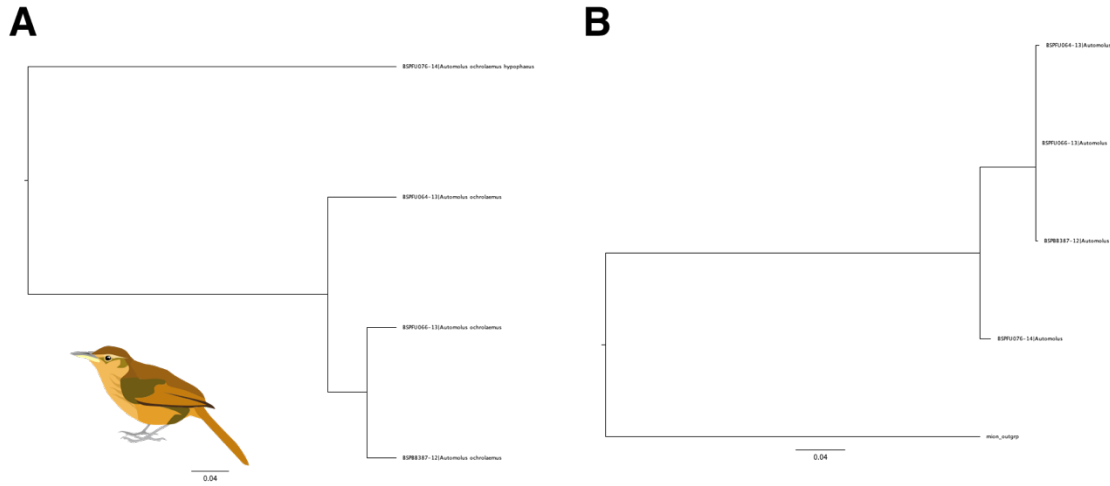

Figure S3: C COI trees of *Automolus ochrolaemus* with both A) a NJ tree constructed in MEGA and B) a ML tree constructed in RaxML.

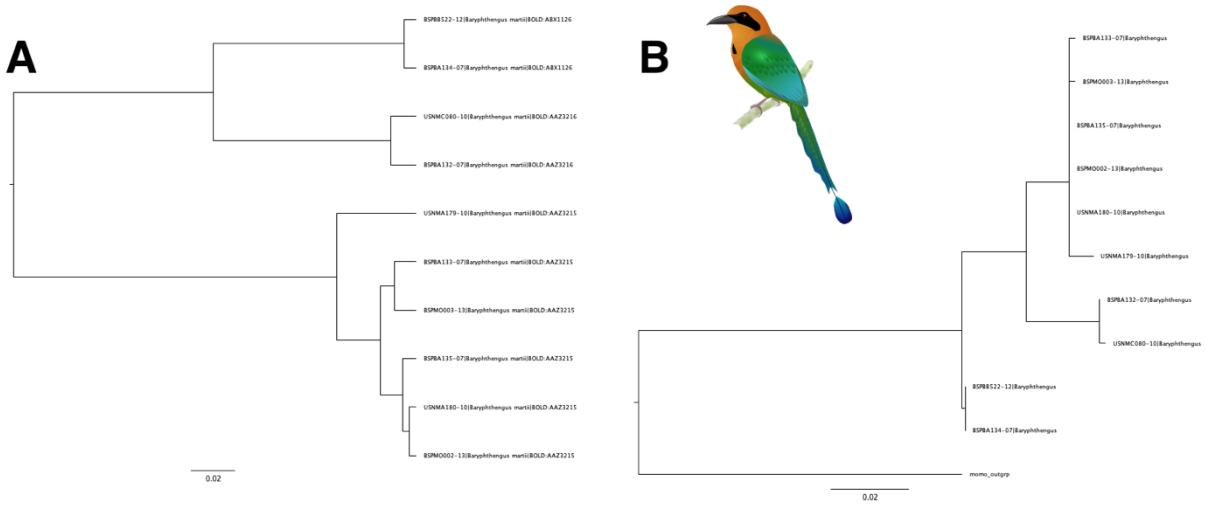

Figure S4: COI trees of *Baryphthengus martii* with both A) a NJ tree constructed in MEGA and B) a ML tree constructed in RaxML.

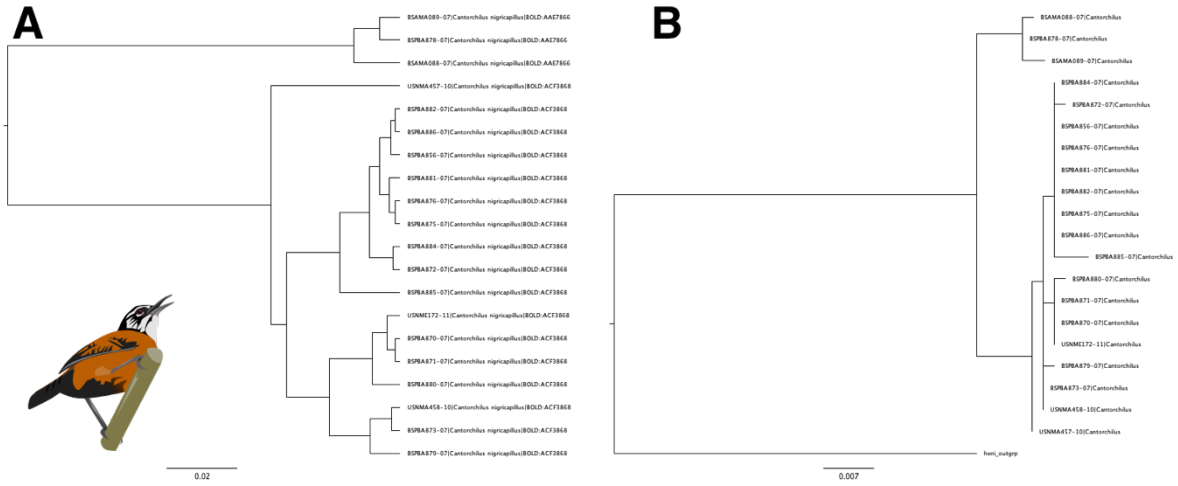

Figure S5: COI trees of *Cantorchilus nigricapillus* with both A) a NJ tree constructed in MEGA and B) a ML tree constructed in RaxML.

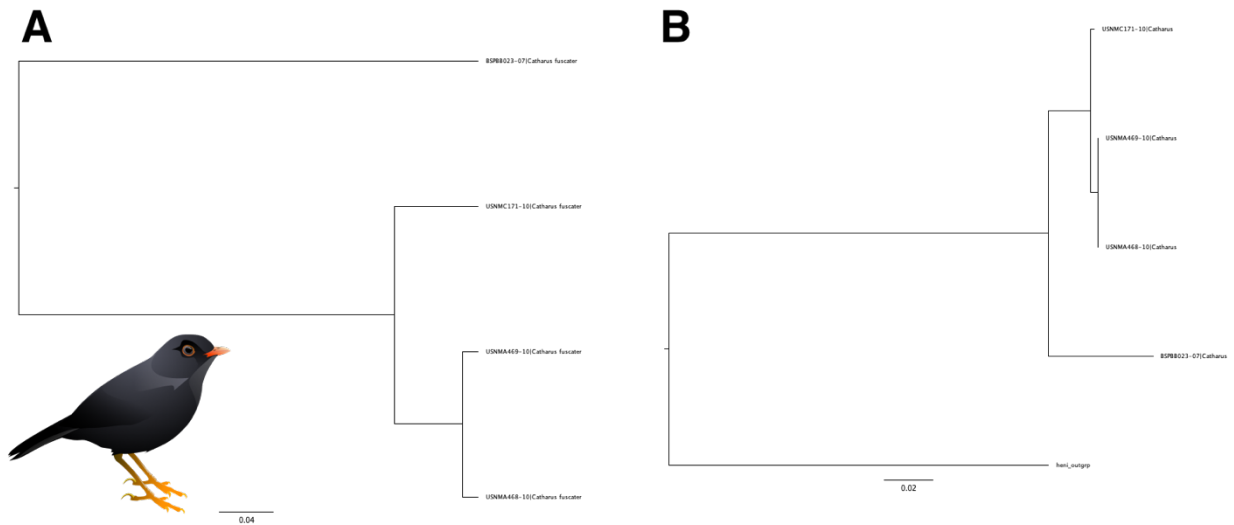

Figure S6: COI trees of *Catharus fuscater* with both A) a NJ tree constructed in MEGA and B) a ML tree constructed in RaxML.

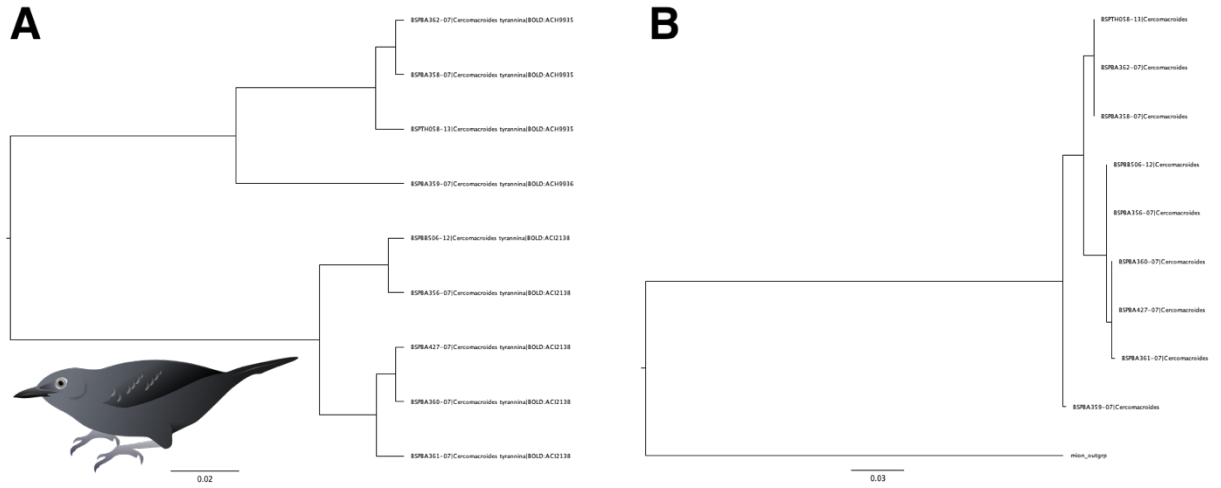

Figure S7: COI trees of *Cercomacra tyrannina* with both A) a NJ tree constructed in MEGA and B) a ML tree constructed in RaxML.

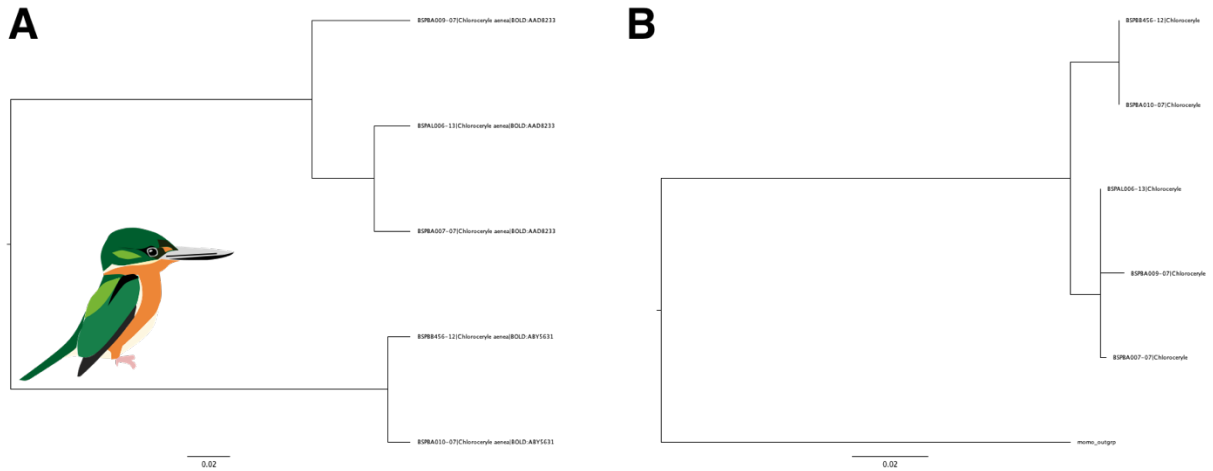

Figure S8: COI trees of *Chloroceryle aenea* with both A) a NJ tree constructed in MEGA and B) a ML tree constructed in RaxML.

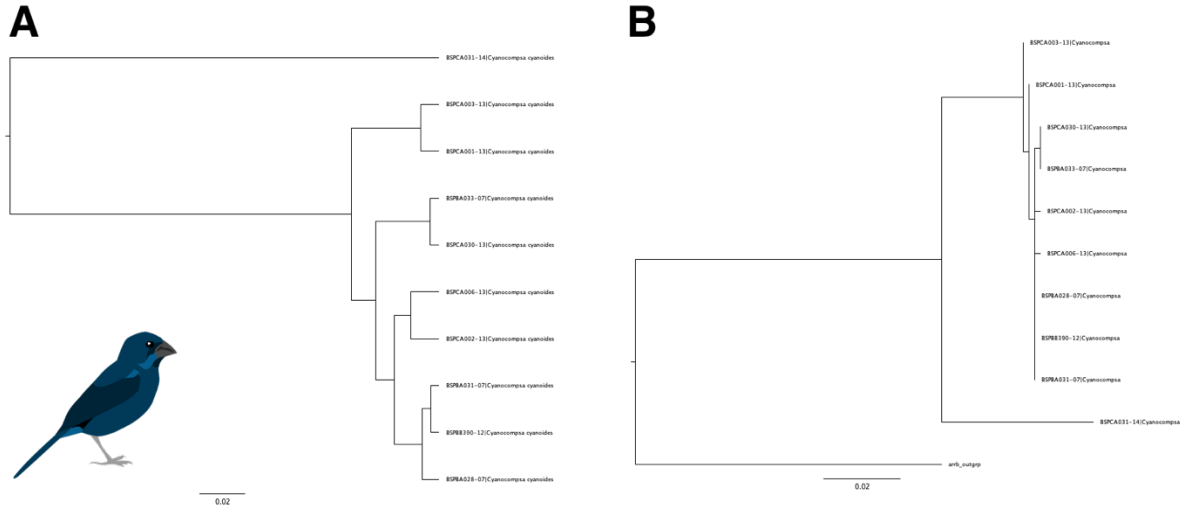

Figure S9: COI trees of *Cyanocompsa cyanoides* with both A) a NJ tree constructed in MEGA and B) a ML tree constructed in RaxML.

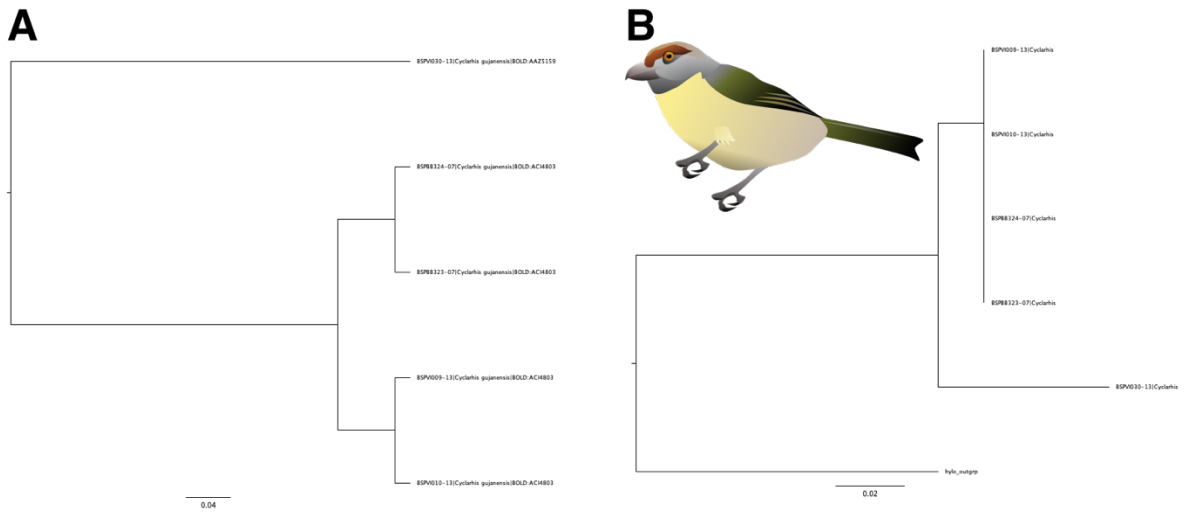

Figure S10: COI trees of *Cyclarhis gujanensis* with both A) a NJ tree constructed in MEGA and B) a ML tree constructed in RaxML.

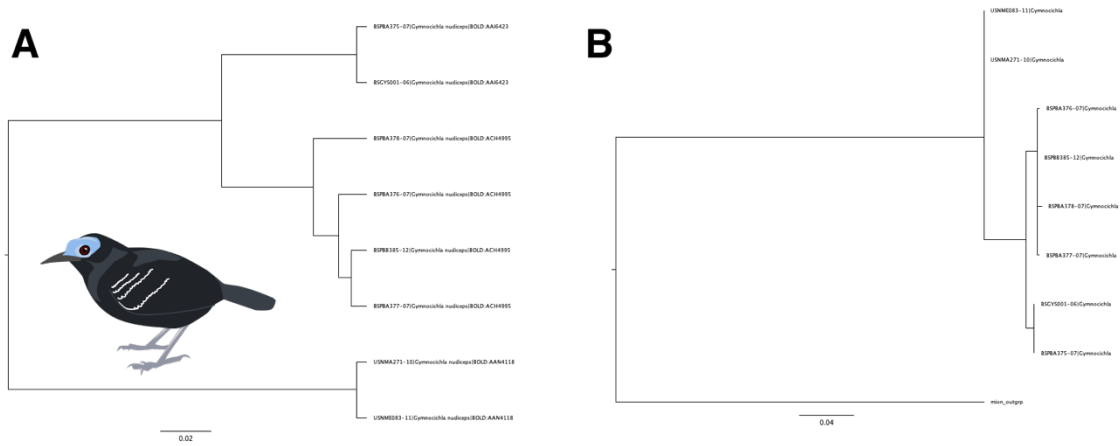

Figure S11: COI trees of *Gymnocichla nudiceps* with both A) a NJ tree constructed in MEGA and B) a ML tree constructed in RaxML.

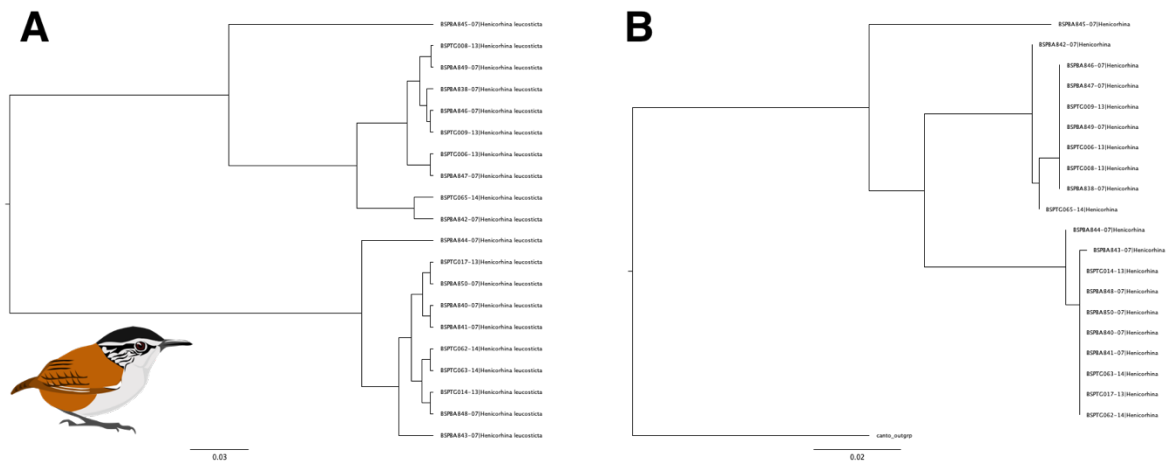

Figure S12: COI trees of *Henicorbhina leucosticte* with both A) a NJ tree constructed in MEGA and B) a ML tree constructed in RaxML.

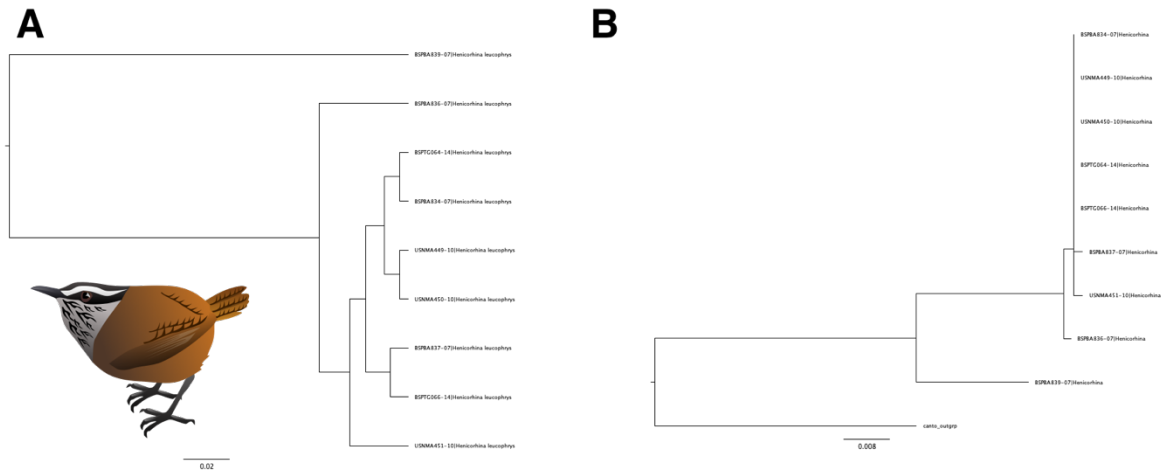

Figure S13: COI trees of *Henicorhina leucophrys* with both A) a NJ tree constructed in MEGA and B) a ML tree constructed in RaxML.

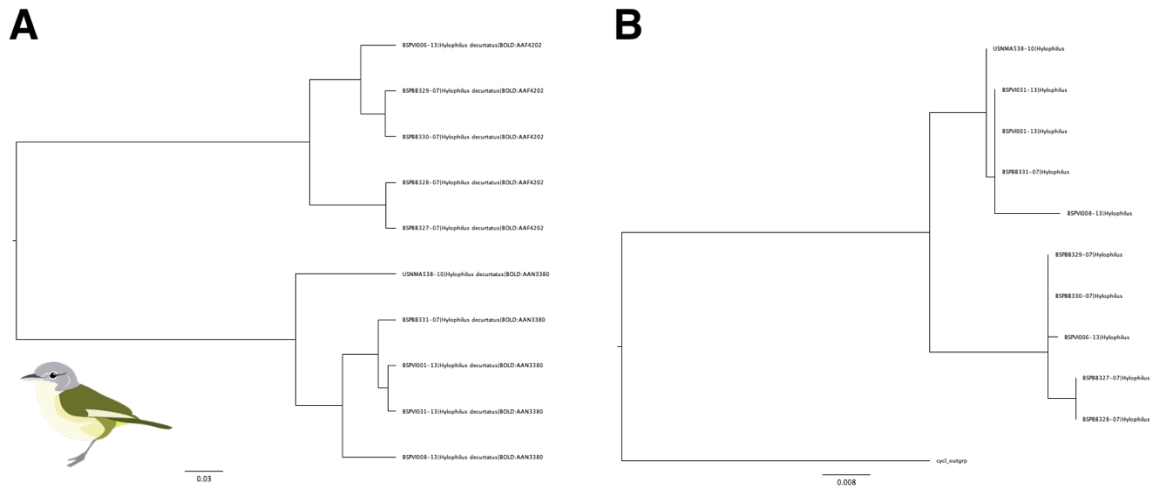

Figure S14: COI trees of *Pachysylvia decurtata* with both A) a NJ tree constructed in MEGA and B) a ML tree constructed in RaxML.

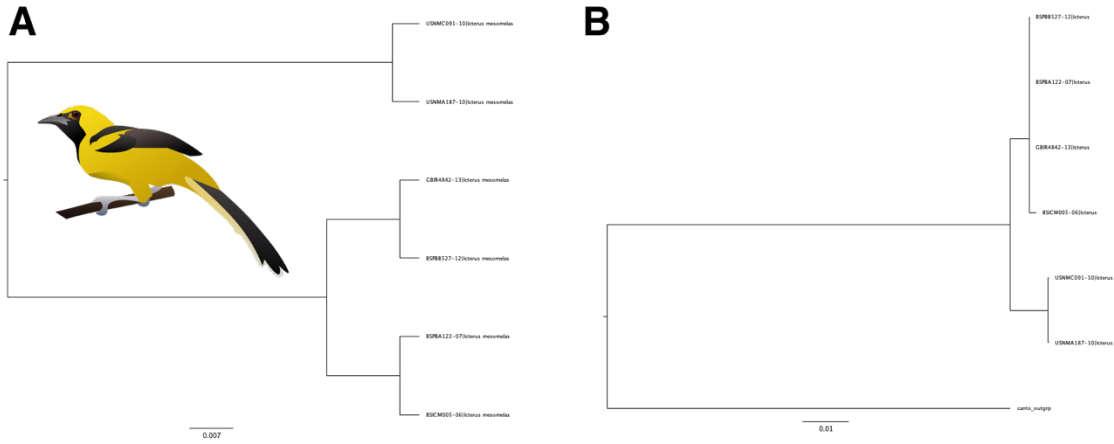

Figure S15: COI trees of *Icterus mesomelas* with both A) a NJ tree constructed in MEGA and B) a ML tree constructed in RaxML.

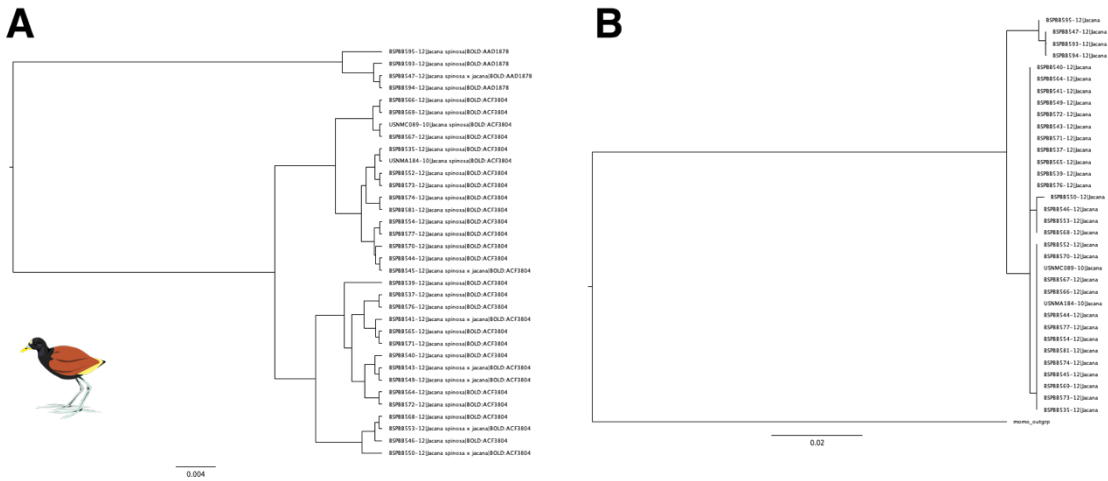

Figure S16: COI trees of *Jacana spinosa* with both A) a NJ tree constructed in MEGA and B) a ML tree constructed in RaxML.



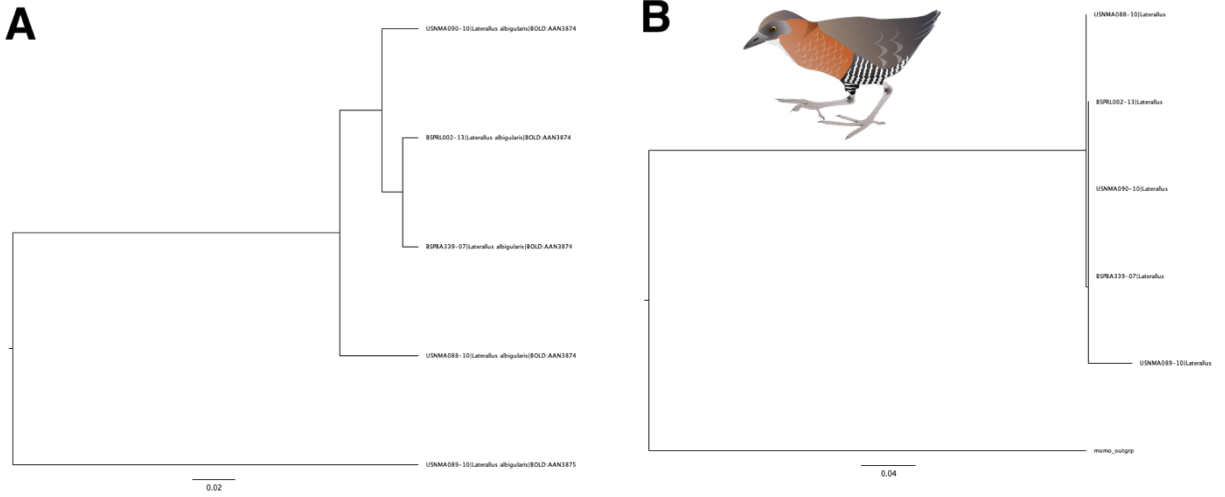

Figure S17: COI trees of *Laterallus albigularis* with both A) a NJ tree constructed in MEGA and B) a ML tree constructed in RaxML.

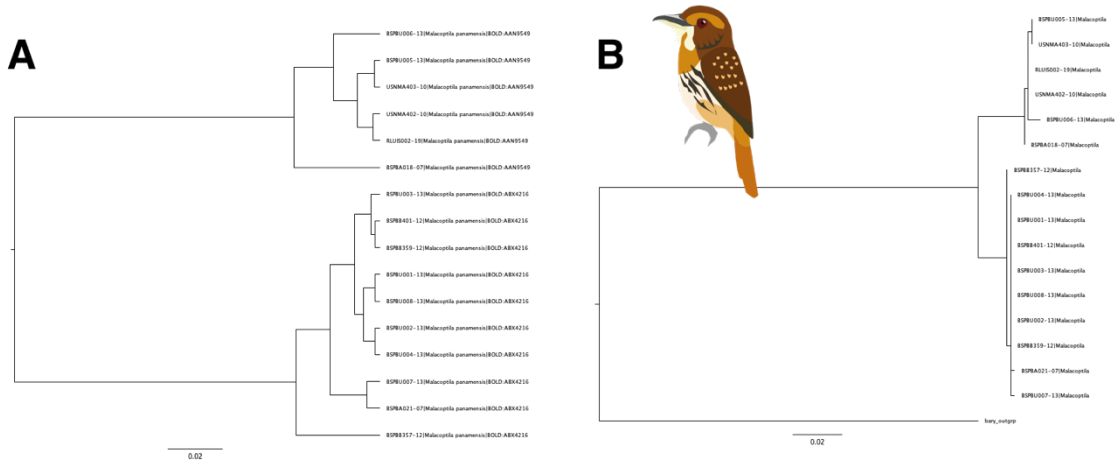

Figure S18: COI trees of *Malacoptila panamensis* with both A) a NJ tree constructed in MEGA and B) a ML tree constructed in RaxML.

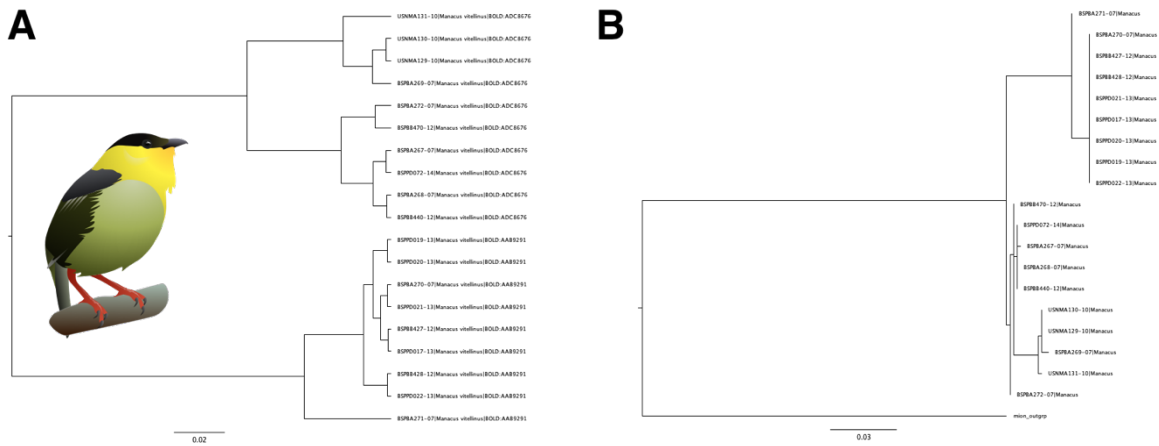

Figure S19: COI trees of *Manacus vitellinus* with both A) a NJ tree constructed in MEGA and B) a ML tree constructed in RaxML.

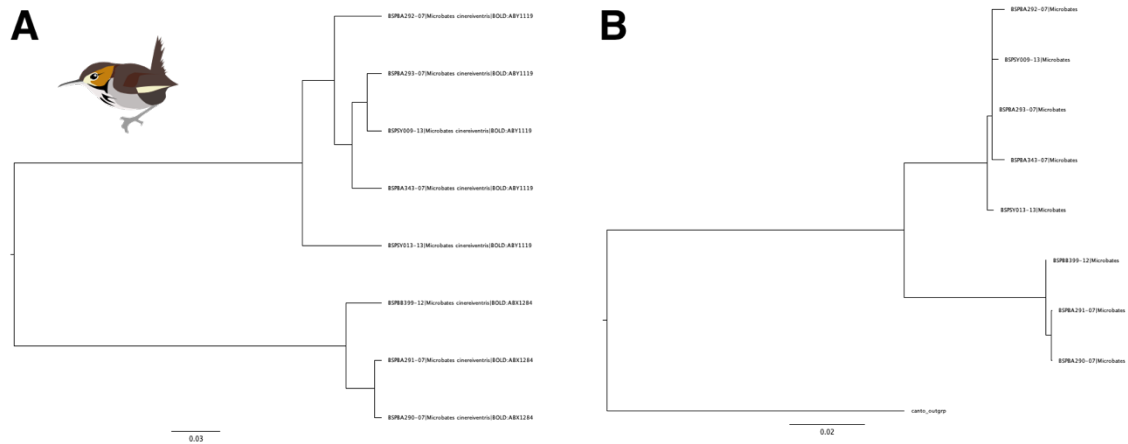

Figure S20: COI trees of *Microbates cinereiventris* with both A) a NJ tree constructed in MEGA and B) a ML tree constructed in RaxML.

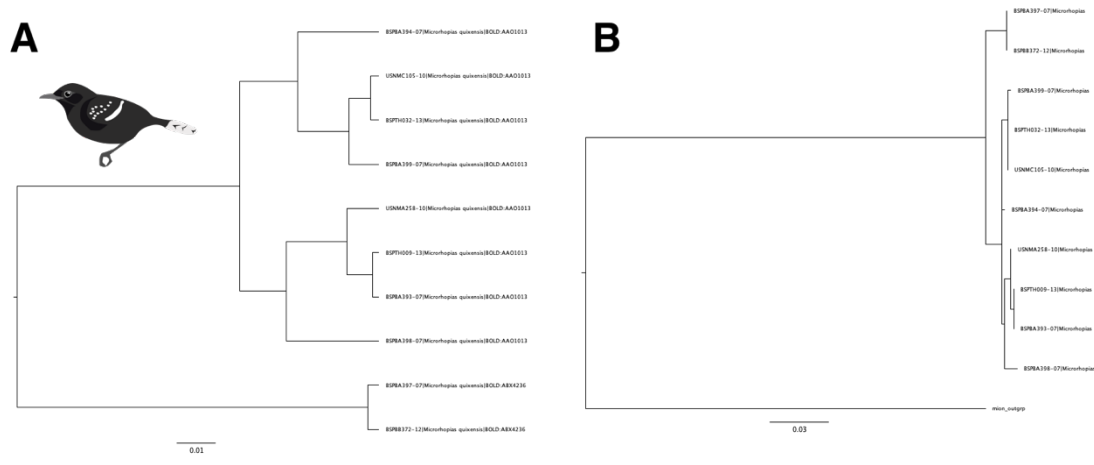

Figure S21: COI trees of *Microrhopias quixensis* with both A) a NJ tree constructed in MEGA and B) a ML tree constructed in RaxML.

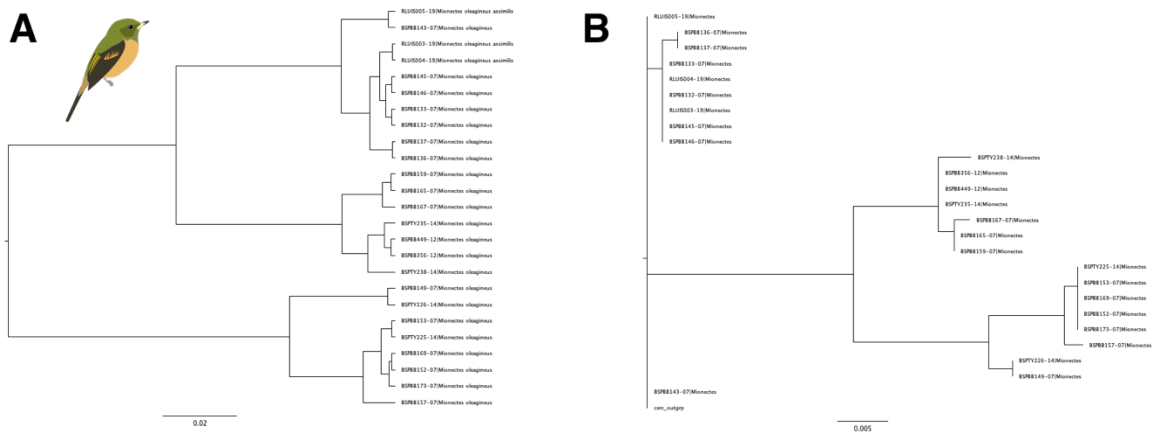

Figure S22: COI trees of *Mionectes oleagineus* with both A) a NJ tree constructed in MEGA and B) a ML tree constructed in RaxML.

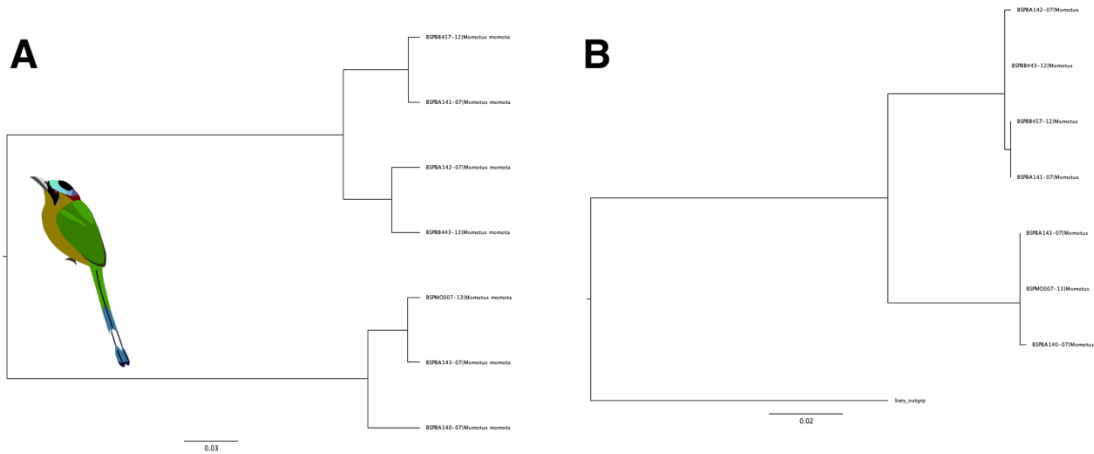

Figure S23: COI trees of *Momotus momota* with both A) a NJ tree constructed in MEGA and B) a ML tree constructed in RaxML.

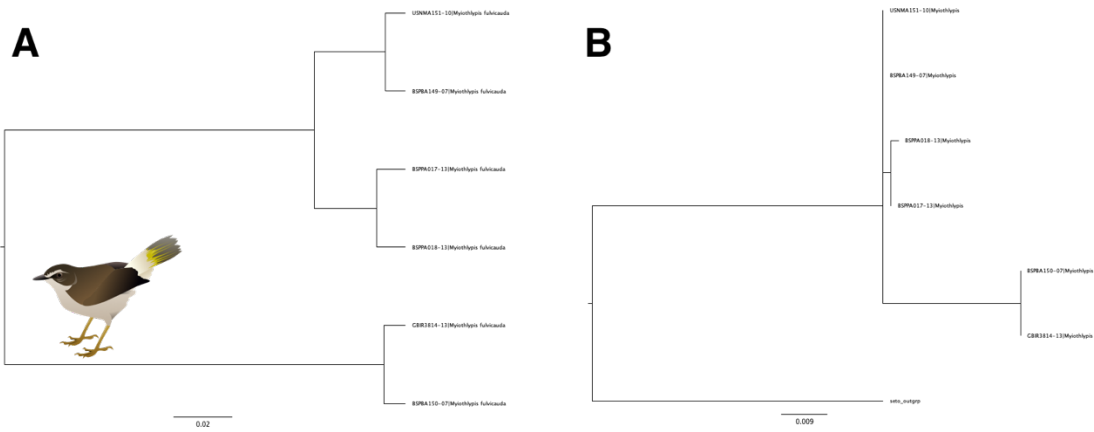

Figure S24: COI trees of *Myioblyps fulvicauda* with both A) a NJ tree constructed in MEGA and B) a ML tree constructed in RaxML.

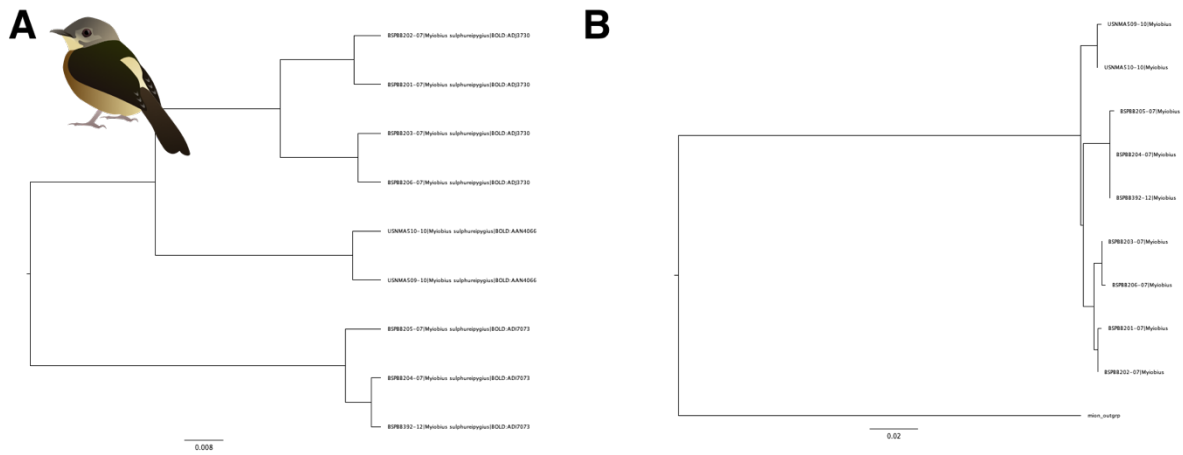

Figure S25: COI trees of *Myiobius sulphureipygius* with both A) a NJ tree constructed in MEGA and B) a ML tree constructed in RaxML.

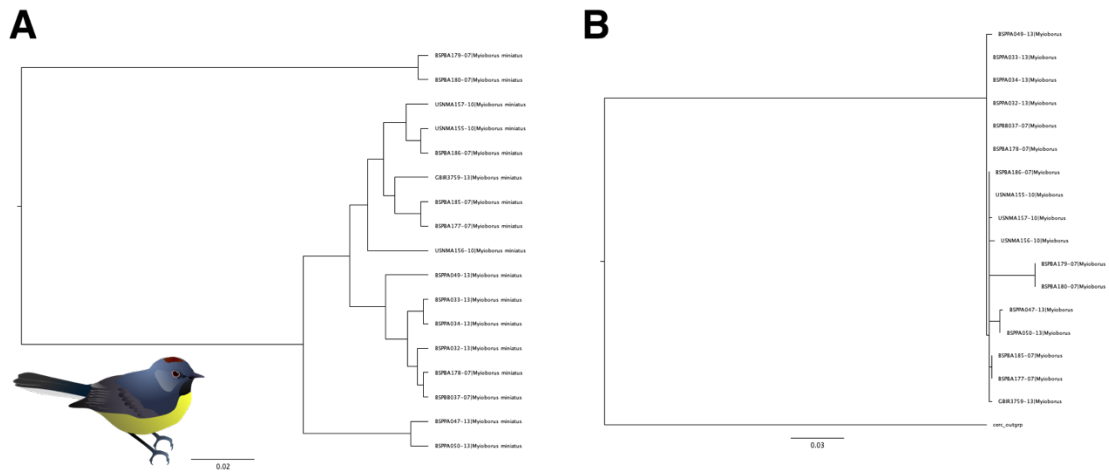

Figure S26: COI trees of *Myioborus miniatus* with both A) a NJ tree constructed in MEGA and B) a ML tree constructed in RaxML.

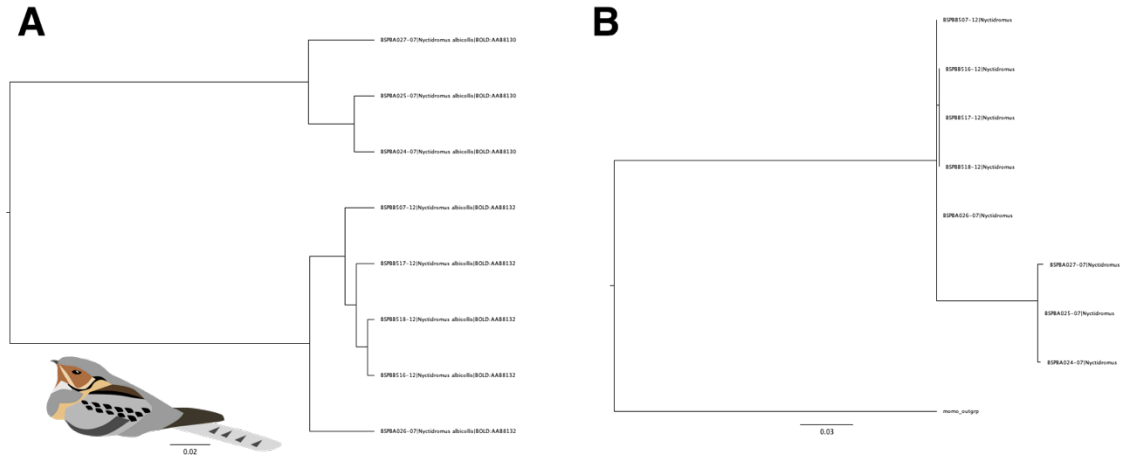

Figure S27: COI trees of *Nyctidromus albicollis* with both A) a NJ tree constructed in MEGA and B) a ML tree constructed in RaxML.

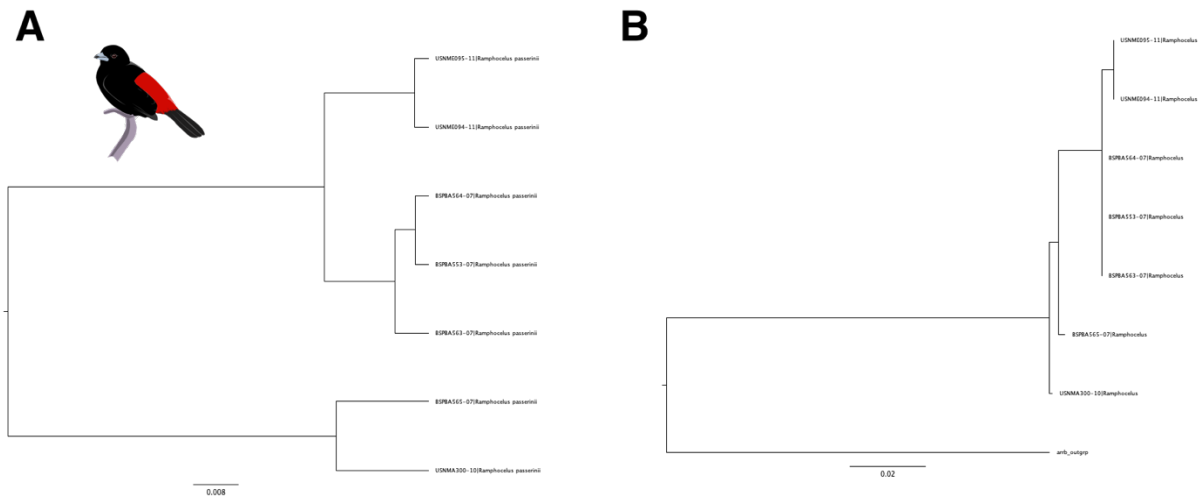

Figure S28: COI trees of *Ramphocelus flammigerus* with both A) a NJ tree constructed in MEGA and B) a ML tree constructed in RaxML.

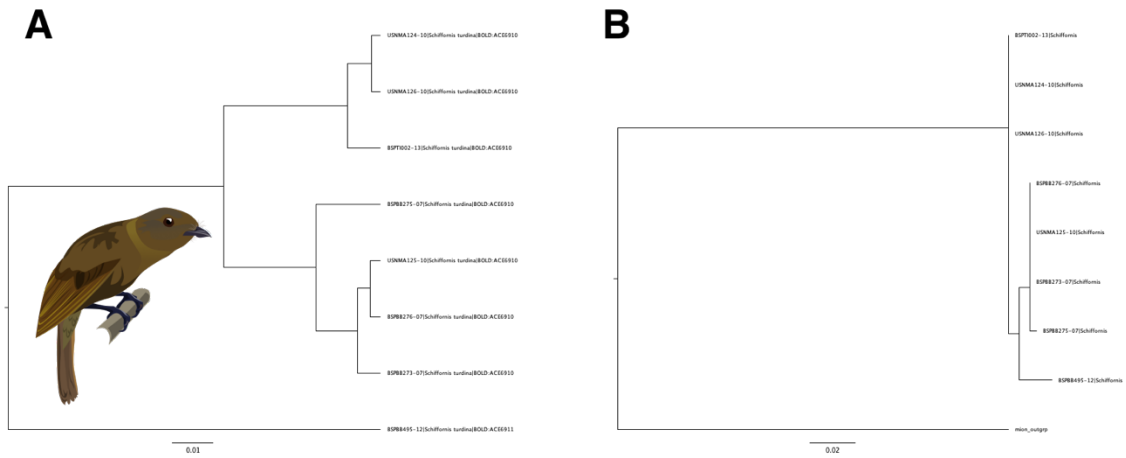

Figure S29: COI trees of *Schiffornis "turdina"* with both A) a NJ tree constructed in MEGA and B) a ML tree constructed in RaxML.

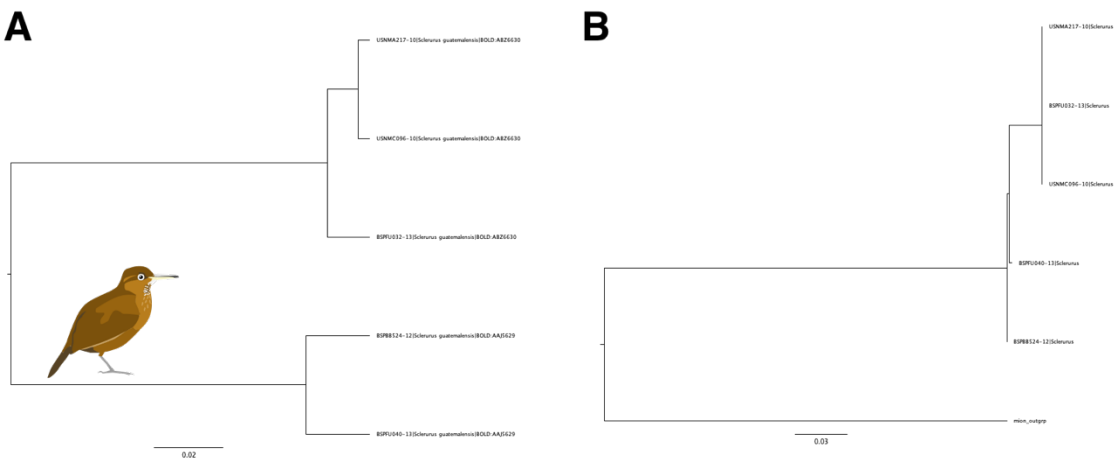

Figure S30: COI trees of *Sclerurus guatemalensis* with both A) a NJ tree constructed in MEGA and B) a ML tree constructed in RaxML.

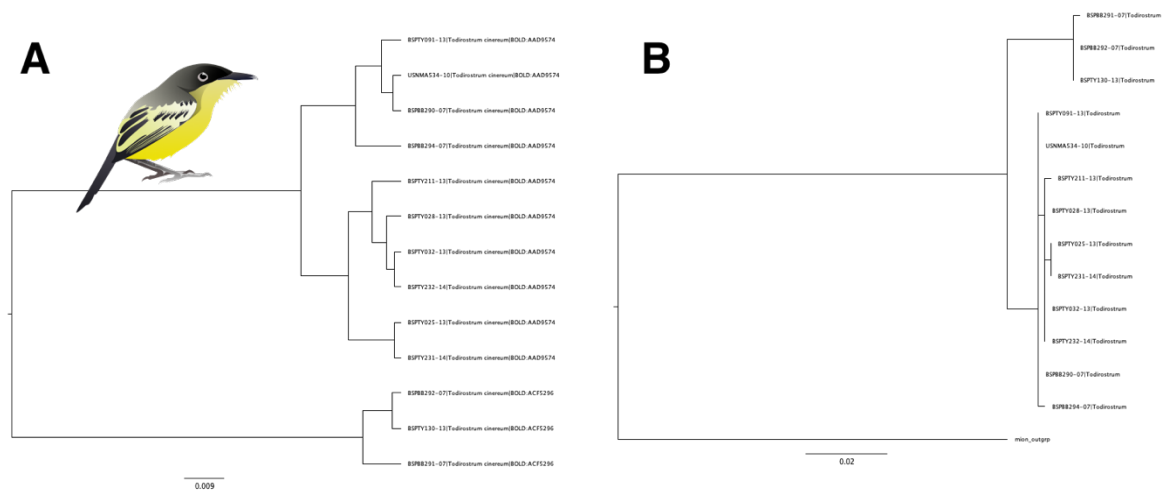

Figure S31: COI trees of *Todiostomum cinereum* with both A) a NJ tree constructed in MEGA and B) a ML tree constructed in RaxML.

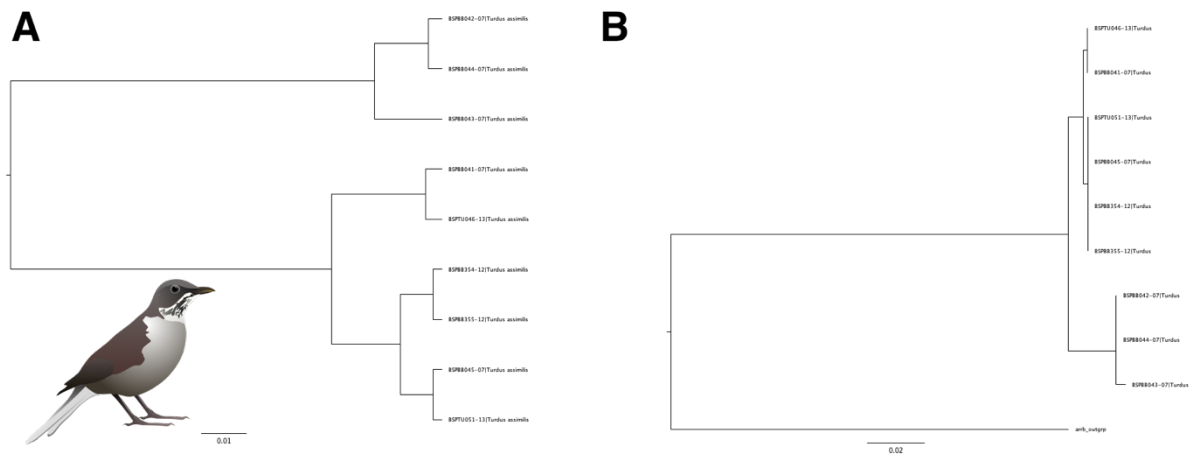

Figure S32: COI trees of *Turdus assimilis* with both A) a NJ tree constructed in MEGA and B) a ML tree constructed in RaxML.



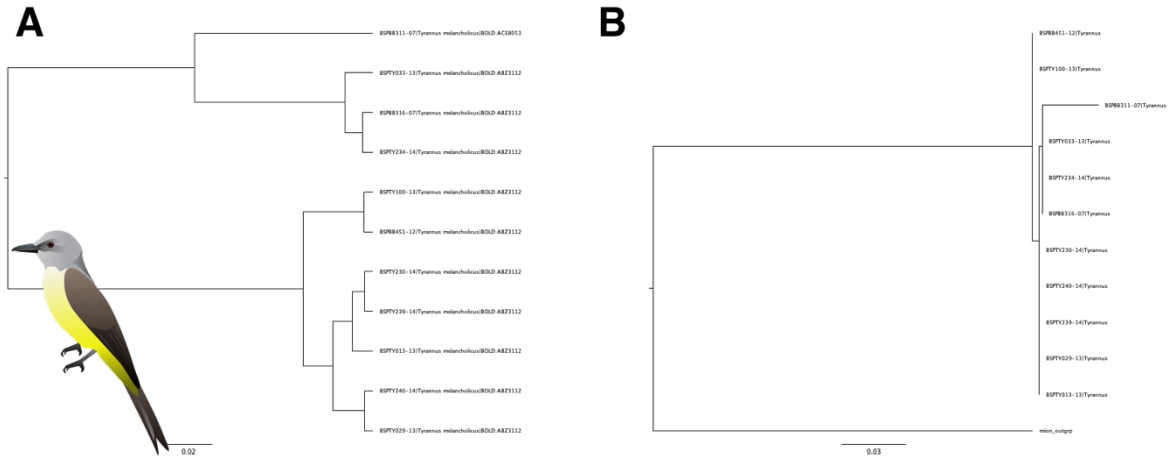

Figure S33: COI trees of *Tyrannus melancholicus* with both A) a NJ tree constructed in MEGA and B) a ML tree constructed in RaxML.

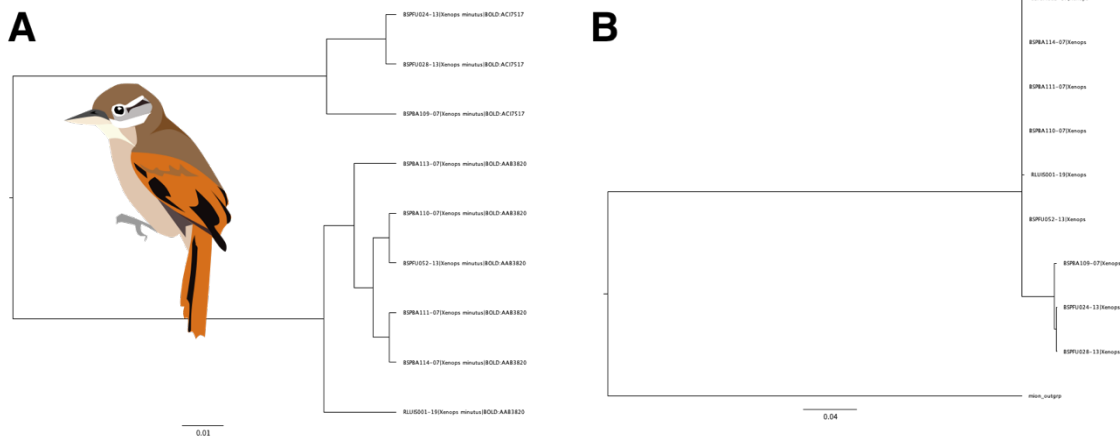

Figure S34 COI trees of *Xenops minutus* with both A) a NJ tree constructed in MEGA and B) a ML tree constructed in RaxML.
